# Supplementary material for: Multi-channel acoustic recording and automated analysis of Drosophila courtship songs
Source: PubMed Central journal article supplement (PMC3599446; doi:10.1186/1741-7007-11-11), 2013-01-31
Supplement: 1741-7007-11-11-S2.pdf [file 1741-7007-11-11-S2.pdf]

Additional file 2

Title: Prior art and parts and settings used for new courtship chambers

Additional Table S2. Publications that first reported a new microphone or amplifier design for recording *Drosophila melanogaster* courtship song, along with several key features of each design.

| Publication                                          | Microphone                                                        | Amplifier                                   | Bandpass filter                                               | Chamber size      |
|------------------------------------------------------|-------------------------------------------------------------------|---------------------------------------------|---------------------------------------------------------------|-------------------|
| (Shorey 1962)                                        | Altex 21 D condenser                                              | ND                                          | ND                                                            | 12 mm D x 10 mm H |
| (Ewing and Bennet-Clark 1968)                        | Acos 43-1 crystal mic                                             | Low noise preamplifier                      | 10-1500 Hz                                                    | 40mm D x 5mm H    |
| (Bennet-Clark 1972) – Illustrated at bottom of table | Grampian ribbon mic                                               | Low impedance amplifier, with design (200X) | 50-5000 Hz                                                    |                   |
| (Kyriacou and Hall 1980)                             | Reslo ribbon mic                                                  | Tandberg 10X reel-to-reel tape recorder     | ND                                                            | 20x10x3mm         |
| (Kawanashi and Watanabe 1980)                        | Dynamic mic                                                       |                                             |                                                               | 10mm D x 3mm H,   |
| (Crossley and McDonald 1980)                         | Brüel and Kjaer Type 4145 in sound attenuated room                |                                             | 120-750 Hz                                                    | 21mm D x 7mm H    |
| (Cowling and Burnet 1981)                            | Reslo ribbon mic                                                  | Tandberg 3600 XD tape recorder              | 50-500 Hz                                                     | 30x10x15mm        |
| (Gorczyca and Hall 1987)                             | Insectavox – modified condenser microphone (Radio Shack #270-090) | LM387                                       | 80-1500 Hz + Notch filter (to reduce amplitude of sine song!) |                   |
| (Aubin, Rybak et al. 2000)                           | dual B&K 4176 6cm apart                                           |                                             |                                                               | 10mm D x 5mm H    |

|                                                       |                                                |                      |         |               |
|-------------------------------------------------------|------------------------------------------------|----------------------|---------|---------------|
| (Tauber and Eberl 2001)                               | Knowles Acoustics NR-23158 in wall of chamber  | 741 opamp            |         | 9mm D x 6mm H |
| (Clyne and Miesenbock 2008)                           | Knowles Acoustics NR-23160                     | Analog Devices AD620 | 10,000x | 10mm D        |
| (Turner and Miller 2012)<br>10 recordings in parallel | GRAS Sound and Vibration 40PH array microphone |                      | <1k Hz  |               |

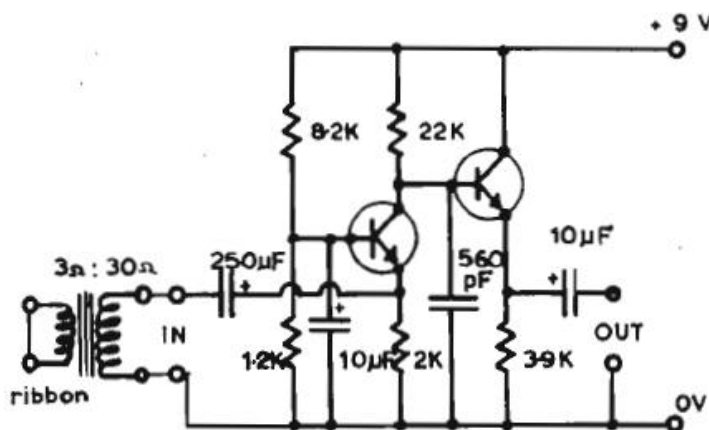

fig.2. LOW IMPEDANCE PRE-AMPLIFIER

## References

- Aubin, T., F. Rybak, et al. (2000). "A simple method for recording low-amplitude sounds. Application to the study of the courtship song of the fruit fly *Drosophila melanogaster*." Bioacoustics 11: 51-67.
- Bennet-Clark, H. C. (1972). "Microphone and pre-amplifier for recording courtship song of *Drosophila*." Drosophila Information Service 49: 127-128.
- Clyne, J. D. and G. Miesenbock (2008). "Sex-specific control and tuning of the pattern generator for courtship song in *Drosophila*." Cell 133(2): 354-363.
- Cowling, D. E. and B. Burnet (1981). "Courtship songs and genetic control of their acoustic characteristics in sibling species of the *Drosophila melanogaster* subgroup." Anim. Behav. 29: 924-935.
- Crossley, S. and J. McDonald (1980). "A method for permanently recording courtship song and courtship behavior simultaneously in *Drosophila*." Drosophila Information Service 55: 150-151.
- Ewing, A. W. and H. C. Bennet-Clark (1968). "The courtship songs of *Drosophila*." Behaviour 31: 288-301.

- Gorczyca, M. and J. C. Hall (1987). "The INSECTAVOX, an integrated device for recording and amplifying courtship songs." Drosophila Information Service 66: 157-160.
- Kawanashi, M. and T. K. Watanabe (1980). "Genetic variation of courtship song of *Drosophila melanogaster* and *D. simulans*." Japan. J. Genetics 55: 235-240.
- Kyriacou, C. P. and J. C. Hall (1980). "Circadian rhythm mutation in *Drosophila melanogaster* affect short-term fluctuation in the male's courtship song." PNAS 77: 6729-6733.
- Shorey, H. H. (1962). "Nature of the Sound Produced by *Drosophila melanogaster* during Courtship." Science 137(3531): 677-678.
- Tauber, E. and D. F. Eberl (2001). "Song production in auditory mutants of *Drosophila*: the role of sensory feedback." Journal of comparative physiology. A, Sensory, neural, and behavioral physiology 187(5): 341-348.
- Turner, T. L. and P. M. Miller (2012). "Investigating Natural Variation in *Drosophila* Courtship Song by the Evolve and Resequence Approach." Genetics.

Additional Table S3. List of parts used in construction of courtship chambers, acrylic platform and acrylic shielding.

|                       | Parts                     | Vendor           | Cat. No.   | Item description                                                                   |
|-----------------------|---------------------------|------------------|------------|------------------------------------------------------------------------------------|
| Chambers              | Chamber top               | McMaster-Carr    | 8490K182   | 2 mm thick transparent acrylic                                                     |
|                       | Chamber bottom            | McMaster-Carr    | 8560K192   | 3 mm thick transparent acrylic                                                     |
|                       | Screw for a chamber       | McMaster-Carr    | B000FN68D0 | Nylon 6/6 Thumb Screw, Knurled Head                                                |
|                       | Chamber divider           |                  |            | 0.25mm stainless steel                                                             |
|                       | Nylon mesh                | Small Parts Inc. | B000FMWH6I | Nylon 6 Woven Mesh Sheet, Square Openings 350um                                    |
| Acrylic platform      | Microphone mounting table | McMaster-Carr    | 8560K219   | 4.5 mm thick transparent acrylic                                                   |
|                       | Mounting standoff         | McMaster-Carr    | 93620A199  | Male-Female Thread Hex Standoff 1/2" Hex, 2" Length, 1/4"-20 Screw Size            |
|                       |                           |                  | 93505A183  | Aluminum Male-Female Threaded Hex Standoff 1/2" Hex, 1/2" Length, 10-32 Screw Size |
|                       | Breadboard                | Thorlabs         | MB1824     | Aluminum Breadboard, 18" x 24" x 1/2", 1/4"-20 Threaded                            |
|                       | Vibration absorbing feet  | Thorlabs         | AV1        | 1/4"-20 Thread                                                                     |
| Acrylic shielding box | Acrylic shielding box     | McMaster-Carr    | 8560K243   | 12 mm thick transparent acrylic                                                    |
|                       | Epoxy                     | Amazon           | B000ALJ4NS | Epoxy for General Purpose                                                          |
|                       | Foam tape                 | Amazon           | B000CSIBCO | High Density Foam Tape                                                             |
|                       | Clay                      | Dick Blick       | 33268-2521 | Modeling Clay                                                                      |

Additional Table S4. Settings applied to cut acrylic on UNIVERSAL Laser Systems PLS4.75 laser cutter.

**chamber-bottom**

| line color | power | speed | PPI  |
|------------|-------|-------|------|
| red        | 100%  | 5%    | 500  |
| black      | 100%  | 14%   | 1000 |
| blue       | 100%  | 5%    | 500  |

image density=6

**chamber-top**

| line color | power | speed | PPI |
|------------|-------|-------|-----|
| red        | 100%  | 7%    | 500 |
| black      | 100%  | 90%   | 500 |

density=1

**microphone mounting table**

| line color | power | speed | PPI |
|------------|-------|-------|-----|
| red        | 100%  | 2.5%  | 500 |
| black      | 100%  | 90%   | 500 |

density=6

**sound shielding box**

| line color | power | speed | PPI |
|------------|-------|-------|-----|
| red        | 100%  | 1%    | 500 |
| black      | 100%  | 90%   | 500 |

density=1

**nylon mesh**

| line color | power | speed | PPI |
|------------|-------|-------|-----|
| red        | 100%  | 80%   | 500 |
